# Supplementary material for: Knowledge of Community Pharmacists in Saudi Arabia Regarding Human Monkeypox, Its Management, Prevention, and Vaccination: Findings and Implications
Source: MDPI journal article supplement (doi:10.3390/vaccines11040878), 2023-04-21
Supplement: s1 [file s1]

## Supplementary Tables

Table S1: Survey of Knowledge of community pharmacists regarding human monkeypox

### *Demographic data:*

#### 1. Gender

- ☐ Male
- ☐ Female

#### 2. Age

- ☐ 24-30
- ☐ 31-40
- ☐ 41-50
- ☐ >50

#### 3. Qualifications

- ☐ BPharm
- ☐ PharmD
- ☐ Postgraduate Diploma
- ☐ MSc/MPharm/equivalent or higher

#### 4. Experience as a community pharmacist in Saudi Arabia (in years)

- ☐ Less than 1 year
- ☐ 1 to 5 years
- ☐ 6 to 10 years
- ☐ More than 10 years

**Knowledge statements:**

| No. | Statement                                                                                                                                            | Yes | No | I do not know |
|-----|------------------------------------------------------------------------------------------------------------------------------------------------------|-----|----|---------------|
| 1   | Monkeypox is caused by a virus (i.e. a viral disease infection)                                                                                      | ◆   |    |               |
| 2   | Monkeypox is a newly discovered disease in humans in 2022                                                                                            |     | ◆  |               |
| 3   | Globally, in this year 2022, monkeypox has caused less than 10000 cases till now                                                                     |     | ◆  |               |
| 4   | In Saudi Arabia, there are reported cases of monkeypox in 2022                                                                                       | ◆   |    |               |
| 5   | The current global outbreak of monkeypox is declared by the World Health Organization (WHO) a Public Health Emergency of International Concern       | ◆   |    |               |
| 6   | Skin rashes and lesions are one of the key characteristics for identifying monkeypox                                                                 | ◆   |    |               |
| 7   | The following are signs and symptoms that can occur in persons with monkeypox:                                                                       |     |    |               |
|     | Fever                                                                                                                                                | ◆   |    |               |
|     | Chills                                                                                                                                               | ◆   |    |               |
|     | Lymphadenopathy (swelling of the lymph nodes)                                                                                                        | ◆   |    |               |
|     | Headache                                                                                                                                             | ◆   |    |               |
|     | Exhaustion/lack of energy                                                                                                                            | ◆   |    |               |
|     | Muscle aches                                                                                                                                         | ◆   |    |               |
|     | back pain                                                                                                                                            | ◆   |    |               |
|     | Respiratory symptoms (e.g. sore throat, nasal congestion, cough)                                                                                     | ◆   |    |               |
| 8   | The incubation period of monkeypox (i.e., time from exposure to the pathogen to onset of symptoms) can range from 1-5 days                           |     | ◆  |               |
| 9   | Monkeypox symptoms typically last from 2 to 4 weeks                                                                                                  | ◆   |    |               |
| 10  | The case-fatality rate (معدل الوفاة) for monkeypox infection has been estimated at approximately 30%                                                 |     | ◆  |               |
| 11  | Human-to-human transmission can occur via close contact with skin lesions or respiratory secretions of an infected person with monkeypox             | ◆   |    |               |
| 12  | Human-to-human transmission can occur via prolonged face-to-face contact with an infected person                                                     | ◆   |    |               |
| 13  | Persons could get infected via direct contact with objects, surfaces, or materials contaminated with the monkeypox                                   | ◆   |    |               |
| 14  | Animal-to-human transmission can occur via eating inadequately cooked meat and other animal products of an infected animal                           | ◆   |    |               |
| 15  | Asymptomatic individuals (i.e. during the incubation period of the infection) are the main source of spreading the monkeypox infection               |     | ◆  |               |
| 16  | Diagnosis of monkeypox infection is confirmed by using a real-time polymerase chain reaction (PCR) test                                              | ◆   |    |               |
| 17  | Medications such as tecovirimat and brincidofovir that were developed to treat smallpox may be used to treat monkeypox                               | ◆   |    |               |
| 18  | There are approved vaccines for the prevention of monkeypox                                                                                          | ◆   |    |               |
| 19  | Standard preventive and precautionary measures are effective in preventing monkeypox                                                                 | ◆   |    |               |
| 20  | Supportive care and adequate hydration may be enough for most patients with an intact (healthy) immune system                                        | ◆   |    |               |
| 21  | Patients with severe monkeypox symptoms or at increased risk to develop severe monkeypox infection should be referred for a specialized medical care | ◆   |    |               |

**This symbol ◆ indicates the correct answer**
